# Supplementary material for: Commensal Bacterium Rothia aeria Degrades and Detoxifies Gluten via a Highly Effective Subtilisin Enzyme
Source: PubMed Central journal article supplement (PMC7761627; doi:10.3390/nu12123724), 2020-12-02
Supplement: nutrients-12-03724-s001.pdf [file nutrients-12-03724-s001.pdf]

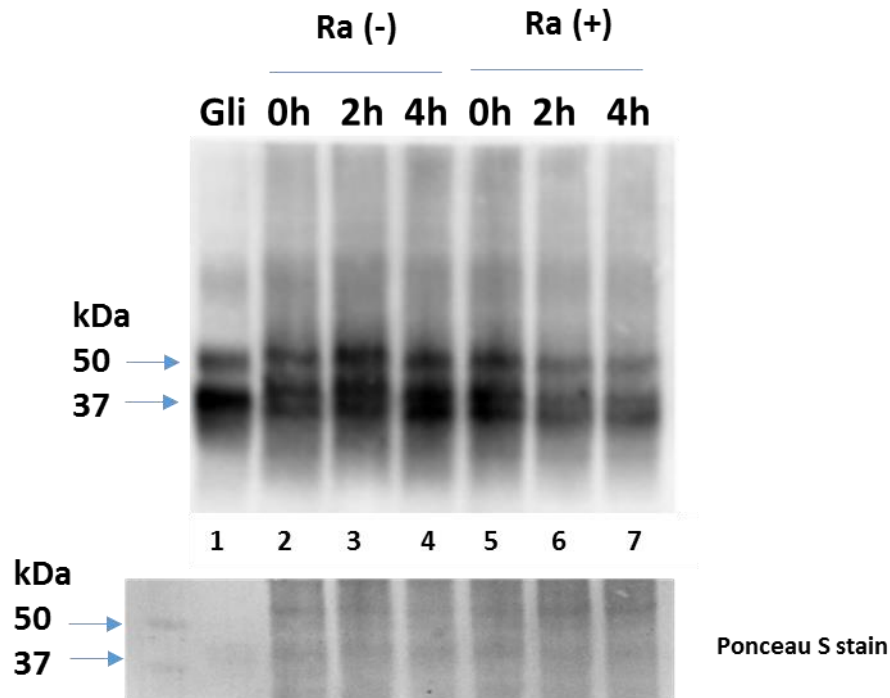

**Supplemental Figure 1 Enzymatic degradation of gliadins in mouse chow *in vitro* detected by immunoblotting.** Mouse chow was supplemented with *R. aeria* (Ra+) and without (Ra-) and incubated at 37°C for 0, 2 and 4 hr. Aliquots (10 µl) of 60% ethanol-extracted sample supernatants were loaded. Lane1: Gliadin control (Gli, 15 µg); Lane 2: Ra (-) at 0 hour; Lane 3: Ra (-) at 2 hr; Lane 4: Ra (-) at 4 hr; Lane 5: Ra (+) at 0 hr; Lane 6: Ra (+) at 2 hr; Lane 7: Ra (+) at 4 hr, blue (arrow) points to the gliadin bands at 37 and 50 kDa.

## MIC Susceptibility of Two *Rothia* Species to Antimicrobics

| Category        | Antimicrobics                            | MIC ( $\mu\text{g/ml}$ ) |          |       |
|-----------------|------------------------------------------|--------------------------|----------|-------|
|                 |                                          | Rm                       | Ra       |       |
| Aminoglycosides | Amikacin                                 | <4                       | <4       |       |
|                 | Gentamicin                               | <1                       | <1       |       |
|                 | Streptomycin                             | <1000                    | <1000    |       |
|                 | Tobramycin                               | 4                        | 8        |       |
| Beta-lactams    | Cephalosporins                           | Cefepime                 | <2       | <2    |
|                 |                                          | Cefotaxime               | <1       | <1    |
|                 |                                          | Ceftazidime              | 4        | 8     |
|                 |                                          | Ceftaroline              | <0.12    | <0.12 |
|                 | Carbapenems                              | Ceftriaxone              | <8       | <8    |
|                 |                                          | Doripenem                | <0.12    | 0.25  |
|                 |                                          | Ertapenem                | <0.25    | 0.5   |
|                 |                                          | Imipenem                 | <1       | <1    |
|                 | Monobactams                              | Meropenem                | <1       | <1    |
|                 | Penicillins                              | Aztreonam                | >16      | >16   |
|                 |                                          | Ampicillin               | <0.12    | <0.12 |
|                 |                                          | Oxacillin+2%NaCl         | <0.25    | <0.25 |
|                 | Glycopeptides                            | Penicillin               | <0.06    | <0.06 |
|                 |                                          | Vancomycin               | <1~1     | 2     |
| Telavancin      |                                          | <0.06                    | 0.12     |       |
| Glycylcyclines  | Tigecycline                              | <0.06                    | 0.12     |       |
| Lincosamides    | Clindamycin                              | <0.5~0.5                 | >2       |       |
| Lipopeptides    | Daptomycin                               | 0.5~1                    | 4        |       |
| Macrolides      | Erythromycin                             | <0.25                    | 4        |       |
| Nitrofurans     | Nitrofurantoin                           | <32                      | <32      |       |
| Oxazolidinones  | Linezolid                                | <1~1                     | 1        |       |
| Polymyxins      | Colistin                                 | >4                       | >4       |       |
|                 | Polymixin B                              | >4                       | >4       |       |
| Quinolones      | Ciprofloxacin                            | 2~4                      | 2~4      |       |
|                 | Gatifloxacin                             | <1                       | <1       |       |
|                 | Levofloxacin                             | <1~2                     | 1        |       |
|                 | Moxifloxacin                             | <0.25                    | 0.5      |       |
| Rifamycins      | Rifampin                                 | <0.5                     | <0.5     |       |
| Tetracyclins    | Doxycycline                              | <2                       | <2       |       |
|                 | Minocycline                              | <2                       | <2       |       |
|                 | Tetracycline                             | <2                       | <2       |       |
| Others          | Chloramphenicol                          | <2                       | <2       |       |
| Combinations    | Piperacillin / tazobactam constant 4     | <8/4                     | <8/4     |       |
|                 | Quinupristin / dalfopristin              | 0.25                     | 0.12     |       |
|                 | Ticarcillin / clavulanic acid constant 2 | <16/2                    | <16/2    |       |
|                 | Trimethoprim / sulfamethoxazole          | <0.5/9.5                 | <0.5/9.5 |       |

**Supplemental Figure 2**, MIC (minimal inhibitory concentration) susceptibility of two *Rothia* species to antibiotics. The experiment was performed by using MIC susceptibility plates (Sensititre, Thermofisher Scientific/ Trek diagnostic systems). MIC was recorded as the lowest concentration of antibiotic that inhibits visible growth. Rm: *Rothia musinoginosa*; Ra: *Rothia aeria*.

There are some concerns that *Rothia* bacteria may cause side effects in patients if they colonize non-naturally areas of the human body. Here data shows that Rm and Ra are susceptible to antibiotics and to 70% ethanol (Figure 2 A). Notably, the dead Rm/Ra still exhibit gluten degrading activity (Figure 2 B-D), indicating that these inactivated Rm and Ra maintain gluten proteolytic activity to benefit CD patients.

>BAV86562.1 glycerol-3-phosphate ABC transporter [*Rothia aeria*]

MAITAGLPATAAPAGDPDTPVAQDIARNSREHAVLSDSMKKAEGNIPVFFVQFKGKGAYEQTQSPAVLANKQAPTNNKQ  
AEVQAIKTQVQSQAQAAAQSTGAKTLYTTHNIMRGVALQGDAAQIRALANNPEVERITPIVPKKKQNAGSVVDTGAA  
ENWARENSGYT**GKDV**KIA**VVD****S**GIDYTHADFGGPGTVEAFNKATKL**TEMPA**AD**S**GLY**DAK**KY**I**GGYDLV**GDS**YDGTN  
**QTAP**DN**NPIDCS**AGGHGTHVAGTAAGYGV**NQD**GTTFRGDY**SKL**TAEQL**NQMKIG**PGAA**PEA**QLY**SFRV**FGCTGTTGV  
VVQALDR**TLD**PNGDGDFSDRANIV**NLS**IGGEF**SPPDD**ADAYAVESLNRQ**GV**LAVVSAGNATDYYGRGDTYSDSG**QPA**  
NAVSALTVANSIGSSYAVDSMEIQAPANVAGKVPGDYTVSYTYTGAKPEAL**TGT**VVTP**SE**SNK**FGCE**AFSAEDA**AKI**  
KDKWV**FLE**WANADGSLPCGSKVRFDNVEKAGGKGVVLSSEEEKPALPIGGNESIPGFRVAKSASAKVREAAANGELK  
VRLG**TDL**KE**SLR**PSNKKD**QLT**ASSARGY**H**GTYGYTKPDVAAPGNNISSARVGTGTDG**ISY**TGT**S**MSAPFAAGVAAQ  
VLQANQSYGPTQLKAAIMNSANHDV**RTAD**GNVYAVDRVGS**GRIDAKAA**AETKVLLYNADRPAQVSQTFGVLE**YAV**NE  
GKQTLTREM**TVEN**FD**SHT**HTY**NI**SYAGSTDMPGVEFSLPSNITVNPGEKKNFTVTITIDPAAMEKTMDPAMEK**THNS**  
VDPYGDGTEL**VPEQ**YRQFIASESGRILLTEGAATLRAPIHAAPK**PASAM**KVEGSSVEIPAGEHQANLKL**TG**TELNQR  
GYK**LLGAF**EHGAS**IERT**SPVKLDVSSNAKANMQHVGAASTAPALKASGGNPNDG**LLAF**GISTWANWDVVSTENTFT  
VNIDTDGNNRADYMLVTDRAK**GID**FP**IV**RLYGYKNGNLEQ**IA**YYPLNNAWGDTDTNMMDSNALVMAVPLKDLGLSAE  
KTKDIKYSVSATTQYAWTNVSETGW**IN**YRPFDPK**LW**FSGTAATVPGFFADAP**SSEL**VAHRAEGATDV**KAL**FLHM**HNT**  
TGDLSGLNGAAGNRAQVLEVTEQQQLDPAPSRFTDVPAENQFYAEINWLAQRRIT**TG**YPDG**TFR**PGENVERGAMAAY  
FYRLAGTPQFTAPDNPTFS**DVP**KSHPFYKEIEWMAARGIT**TG**YGDG**TFR**PSASVNRDAMAAFFYRYAN**SPQFA**APAA  
SPFKDVPANSQFYKEIAWLAEQGITKGWDDGTYR**PGE**PIHRDAMAAFLYRYSDKVLK

**Supplemental Figure 3. Amino acid sequence of *R. aeria* BAV86562.1.** In bold: domain cd07474 representing the peptidase S8 family domain in Vpr-like proteins. BAV86562.1 is not an ABC transporter protein as its name suggests, since it lacks the LSGGQ domains characteristic of the ABC transporter family. The highlighted D, S and H residues comprise the catalytic triad of the subtilisin enzyme.
